# Supplementary material
Source: PubMed Central journal article supplement (PMC2141910)
Supplement: pnas_0704336104_1.pdf [file pnas_0704336104_1.pdf]

ATG GAC AAG ATT CTG ACA GCA TCA TTT TTA CTC CTA GGC CTT CAC CTA GCT  
M D K I L T A S F L L L G L H L A

GGG GTG AAT GGC CAG CAG AAG GAG AAA CAT GAC CAG CAG CAG GTG AGA CAA  
G V N G Q Q K E K H D Q Q Q V R Q

AGT CCC CAA TCT CTG ACA GTC TGG GAA GGA GGA ACC ACA GTT CTG ACC TGC  
S P Q S L T V W E G G T T V L T C

AGT TAT GAG GAC AGC ACT TTT AAC TAC TTC CCA TGG TAC CAA CAG TTC CCT  
S Y E D S T F N Y F P W Y Q Q F P

GGG GAA GGC CCT GCA CTT CTG ATA TCC ATA CTT TCA GTG TCC GAT AAA AAG  
G E G P A L L I S I L S V S D K K

GAA GAT GGA CGA TTC ACA ACC TTC TTC AAT AAA AGG GAG AAA AAG CTC TCC  
E D G R F T T F F N K R E K K L S

TTG CAC ATC ATA GAC TCT CAG CCT GGA GAC TCA GCC ACC TAC TTC TGT GCA  
L H I I D S Q P G D S A T Y F C A

GCA AGT GGG GCT TCT GGA GGA AGC AAT GCA AAG CTA ACC TTC GGG AAA GGC  
A S G A S G G S N A K L T F K G

ACT AAA CTC TCT GTT AAA TCA AAC ATC CAG AAC CCA GAA CCT GCT GTG TAC  
T K L S V K S N I Q N P E P A V Y

CAG TTA AAA GAT CCT CGG TCT CAG GAC AGC ACC CTC TGC CTG TTC ACC GAC  
Q L K D P R S Q D S T L C L F T D

TTT GAC TCC CAA ATC AAT GTG CCG AAA ACC ATG GAA TCT GGA ACG TTC ATC  
F D S Q I N V P K T M E S G T F I

ACT GAC AAA ACT GTG CTG GAC ATG AAA GCT ATG GAT TCC AAG AGC AAT GGG  
T D K T V L D M K A M D S K S N G

GCC ATT GCC TGG AGC AAC CAG ACA AGC TTC ACC TGC CAA GAT ATC TTC AAA  
A I A W S N Q T S F T C Q D I F K

GAG ACC AAC GCC ACC TAC CCC AGT TCA GAC GTT CCC TGT GAT GCC ACG TTG  
E T N A T Y P S S D V P C D A T L

ACT GAG AAA AGC TTT GAA ACA GAT ATG AAC CTA AAC TTT CAA AAC CTG TCA  
T E K S F E T D M N L N F Q N L S

GTT ATG GGA CTC CGA ATC CTC CTG CTG AAA GTA GCC GGA TTT AAC CTG CTC  
V M G L R I L L L K V A G F N L L

ATG ACG CTG AGG CTG TGG TCC AGT  
M T L R L W S S
