# Supplementary material
Source: PubMed Central journal article supplement (PMC2141910)
Supplement: pnas_0704336104_2.pdf [file pnas_0704336104_2.pdf]

ATG TCT AAC ACT GTC CTC GCT GAT TCT GCC TGG GGC ATC ACC CTG CTA TCT  
M S N T V L A D S A W G I T L L S

TGG GTT ACT GTC TTT CTC TTG GGA ACA AGT TCA GCA GAT TCT GGG GTT GTC  
W V T V F L L G T S S A D S G V V

CAG TCT CCA AGA CAC ATA ATC AAA GAA AAG GGA GGA AGG TCC GTT CTG ACG  
Q S P R H I I K E K G G R S V L T

TGT ATT CCC ATC TCT GGA CAT AGC AAT GTG GTC TGG TAC CAG CAG ACT CTG  
C I P I S G H S N V V W Y Q Q T L

GGG AAG GAA TTA AAG TTC CTT ATT CAG CAT TAT GAA AAG GTG GAG AGA GAC  
G K E L K F L I Q H Y E K V E R D

AAA GGA TTC CTA CCC AGC AGA TTC TCA GTC CAA CAG TTT GAT GAC TAT CAC  
K G F L P S R F S V Q Q F D D Y H

TCT GAA ATG AAC ATG AGT GCC TTG GAA CTG GAG GAC TCT GCT ATG TAC TTC  
S E M N M S A L E L E D S A M Y F

TGT GCC AGC TCT CTC GGA GGA TGG GCT GAG CAG TTC TTC GGA CCA GGG ACA  
C A S S L G G W A E Q F F G P G T

CGA CTC ACC GTC CTA GAG GAT CTG AGA AAT GTG ACT CCA CCC AAG GTC TCC  
R L T V L E D L R N V T P P K V S

TTG TTT GAG CCA TCA AAA GCA GAG ATT GCA AAC AAA CAA AAG GCT ACC CTC  
L F E P S K A E I A N K Q K A T L

GTG TGC TTG GCC AGG GGC TTC TTC CCT GAC CAC GTG GAG CTG AGC TGG TGG  
V C L A R G F F P D H V E L S W W

GTG AAT GGC AAG GAG GTC CAC AGT GGG GTC AGC ACG GAC CCT CAG GCC TAC  
V N G K E V H S G V S T D P Q A Y

AAG GAG AGC AAT TAT AGC TAC TGC CTG AGC AGC CGC CTG AGG GTC TCT GCT  
K E S N Y S Y C L S S R L R V S A

ACC TTC TGG CAC AAT CCT CGA AAC CAC TTC CGC TGC CAA GTG CAG TTC CAT  
T F W H N P R N H F R C Q V Q F H

GGG CTT TCA GAG GAG GAC AAG TGG CCA GAG GGC TCA CCC AAA CCT GTC ACA  
G L S E E D K W P E G S P K P V T

CAG AAC ATC AGT GCA GAG GCC TGG GGC CGA GCA GAC TGT GGA ATC ACT TCA  
Q N I S A E A W G R A D C G I T S

GCA TCC TAT CAT CAG GGG GTT CTG TCT GCA ACC ATC CTC TAT GAG ATC CTA  
A S Y H Q G V L S A T I L Y E I L

CTG GGG AAG GCC ACC CTA TAT GCT GTG CTG GTC AGT GGC CTG GTG CTG ATG  
L G K A T L Y A V L V S G L V L M

GCC ATG GTC AAG AAA AAA AAT TCC TGA  
A M V K K K N S \*
