# Supplementary material
Source: PubMed Central journal article supplement (PMC2141910)
Supplement: pnas_0704336104_3.pdf [file pnas_0704336104_3.pdf]

**Table 1. Binding of human cdr2-derived nonamers to HLA-A2.1**

| Rank | Position | Sequence            | ED50     | $t_{1/2}$ | iScore |
|------|----------|---------------------|----------|-----------|--------|
| 1    | 290-298  | LLEEMFL <b>TV</b>   | 6.00E-07 | 5.9       | 0.815  |
| 2    | 203-211  | TMLQAQLSL           | 8.00E-07 | 9.8       | 0.811  |
| 3    | 289-297  | SLLEEMFL <b>T</b>   | 6.00E-06 | 13.9      | 0.803  |
| 4    | 341-349  | RGISLLHEV           | 1.00E-06 | 7         | 0.752  |
| 5    | 65-73    | YLTKQVELL           | 2.00E-06 | 8.1       | 0.645  |
| 6    | 260-268  | MLQ <b>SE</b> HPPFV | 2.00E-06 | 5.4       | 0.584  |
| 7    | 424-432  | ALFKEIFSC           | 3.00E-05 | 18.7      | 0.546  |
| 8    | 217-225  | VT <b>EEEE</b> YGL  | 2.00E-06 | 6.5       | 0.528  |
| 9    | 114-122  | SLTETIECL           | 4.00E-06 | 9.3       | 0.518  |
| 10   | 111-119  | KILSLTETI           | 7.00E-06 | 10.5      | 0.512  |
| 11   | 273-281  | KLVPDSL <b>YV</b>   | 3.00E-06 | 6.1       | 0.499  |
| 12   | 384-392  | <b>AAAK</b> DLTGV   | 3.00E-06 | 6.5       | 0.469  |
| 13   | 246-254  | RALELEAV            | 1.00E-06 | 2.7       | 0.352  |
| 14   | 128-136  | HLQSQVEEL           | 1.00E-05 | 7.7       | 0.323  |
| 15   | 168-176  | RQHFVYDHV           | 6.00E-06 | 3.7       | 0.304  |
| 16   | 391-399  | <b>GVNAQSE</b> PV   | 1.00E-05 | 6.4       | 0.292  |
| 17   | 372-380  | DSL <b>SHKAVQ</b>   | 9.00E-06 | 6.3       | 0.262  |
| 18   | 171-179  | FVYDHVFAE           | 1.00E-05 | 5.5       | 0.282  |
| 19   | 405-413  | <b>LASVNPE</b> PV   | 4.00E-06 | 1.9       | 0.244  |
| 20   | 313-221  | TILSSLAGS           | 2.00E-06 | 1.1       | 0.238  |
| 21   | 204-212  | MLQAQLSLE           | 5.00E-06 | 5.1       | 0.235  |
| 22   | 345-353  | LLHEVDTQY           | 7.00E-06 | 3.5       | 0.204  |
| 23   | 197-205  | HLKKT <b>VTML</b>   | 1.00E-05 | 2.5       | 0.199  |
| 24   | 164-172  | LYDLRQHFV           | 5.00E-07 | 0.4       | 0.199  |
| 25   | 400-408  | ASGWEL <b>LASV</b>  | 1.00E-06 | 0.5       | 0.187  |
| 26   | 120-128  | ECLQTNIDH           | 3.00E-05 | 5.4       | 0.178  |
| 27   | 121-129  | CLQTNIDHL           | 2.00E-05 | 2.4       | 0.176  |
| 28   | 107-113  | ASQ <b>QKILSL</b>   | 8.00E-06 | 3.4       | 0.174  |
| 29   | 125-133  | NIDHLQSQV           | 6.00E-06 | 1.3       | 0.166  |
| 30   | 29-37    | QLAAELGKT           | 2.00E-05 | 1.4       | 0.15   |
| 31   | 274-282  | LVPDSL <b>YVP</b>   | 1.00E-05 | 2.4       | 0.154  |
| 32   | 82-90    | KVYEQLDVT           | 8.00E-06 | 1.3       | 0.139  |
| 33   | 201-209  | <b>TVT</b> MLQAQL   | 3.00E-06 | 0.6       | 0.132  |
| 34   | 237-245  | LGAT <b>GAYRA</b>   | 1.00E-05 | 1.2       | 0.13   |
| 35   | 373-381  | SL <b>SHKAVQT</b>   | 4.00E-06 | 0.8       | 0.129  |
| 36   | 225-233  | <b>LVL</b> KENSEL   | 7.00E-06 | 0.8       | 0.119  |
| 37   | 355-363  | ALKV <b>KYEEL</b>   | 7.00E-06 | 0.8       | 0.107  |
| 38   | 176-184  | VFAEK <b>ITSL</b>   | 5.00E-06 | 0.4       | 0.106  |

The top peptides bound to HLA-A2.1, ranked by iTopia iScore, are shown. This ranking is a composite of three variables: relative HLA-A2.1 binding (which was >30% of the control for all peptides shown), the concentration of peptide required to fold 50% of the plate-bound monomer (ED50), and the amount of time in hours required for 50% of the formed complexes to decay ( $t_{1/2}$ ). Residues in bold are nonhomologous to the murine sequence.
